# Supplementary material for: Two Lignan Glycosides from Albizia julibrissin Durazz. Noncompetitively Inhibit Serotonin Transporter
Source: MDPI journal article supplement (doi:10.3390/ph15030344), 2022-03-11
Supplement: s1 [file s1]

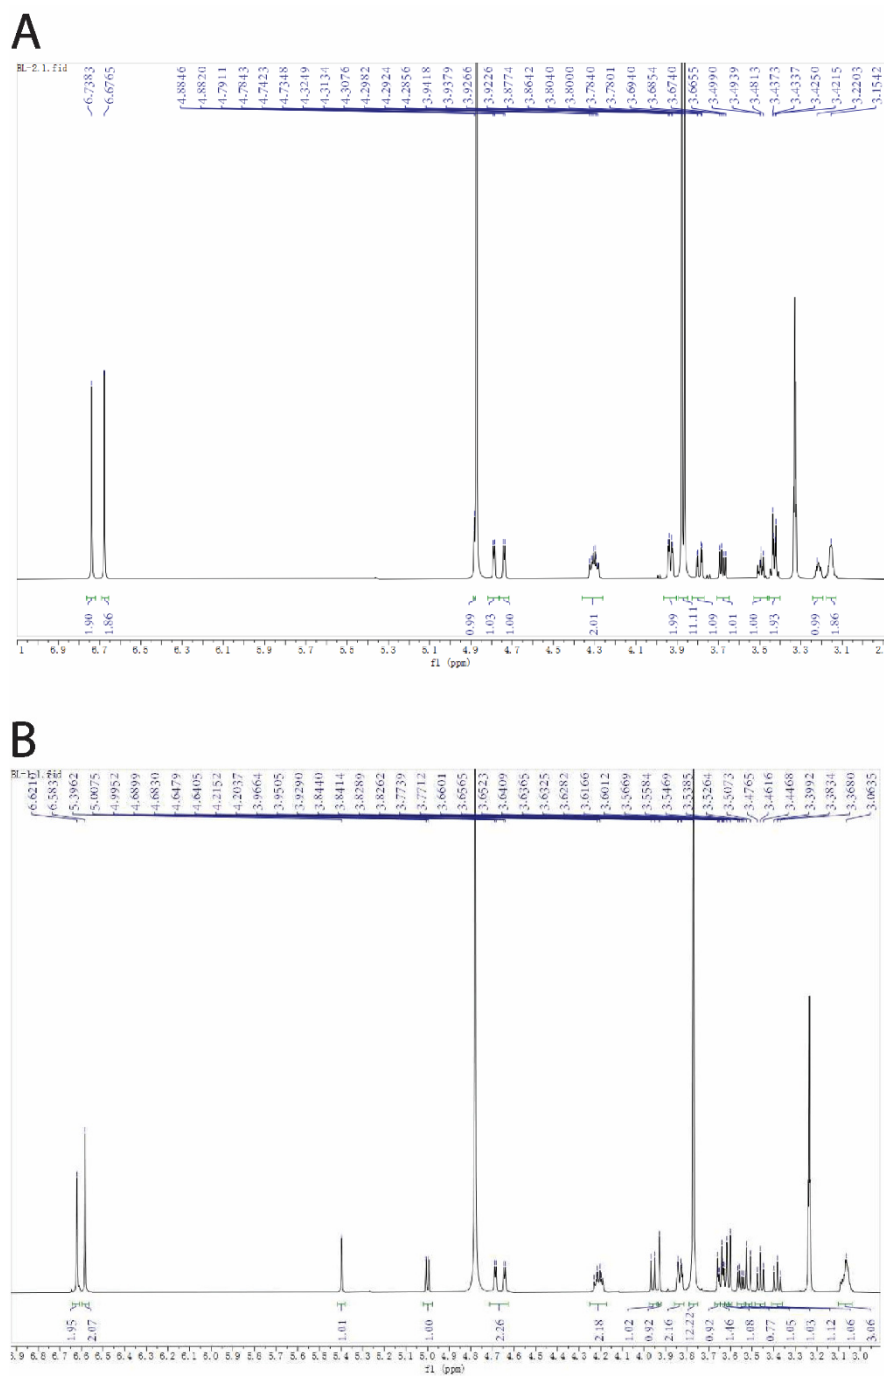

**Figure S2.**  $^1\text{H}$ -NMR spectrum of SAG (A) and SBG (B).  $^1\text{H}$ -NMR spectroscopy of the two compounds was detected with the Bruker NMR spectrometer Avance III 400 according to the manufacturer's manual.

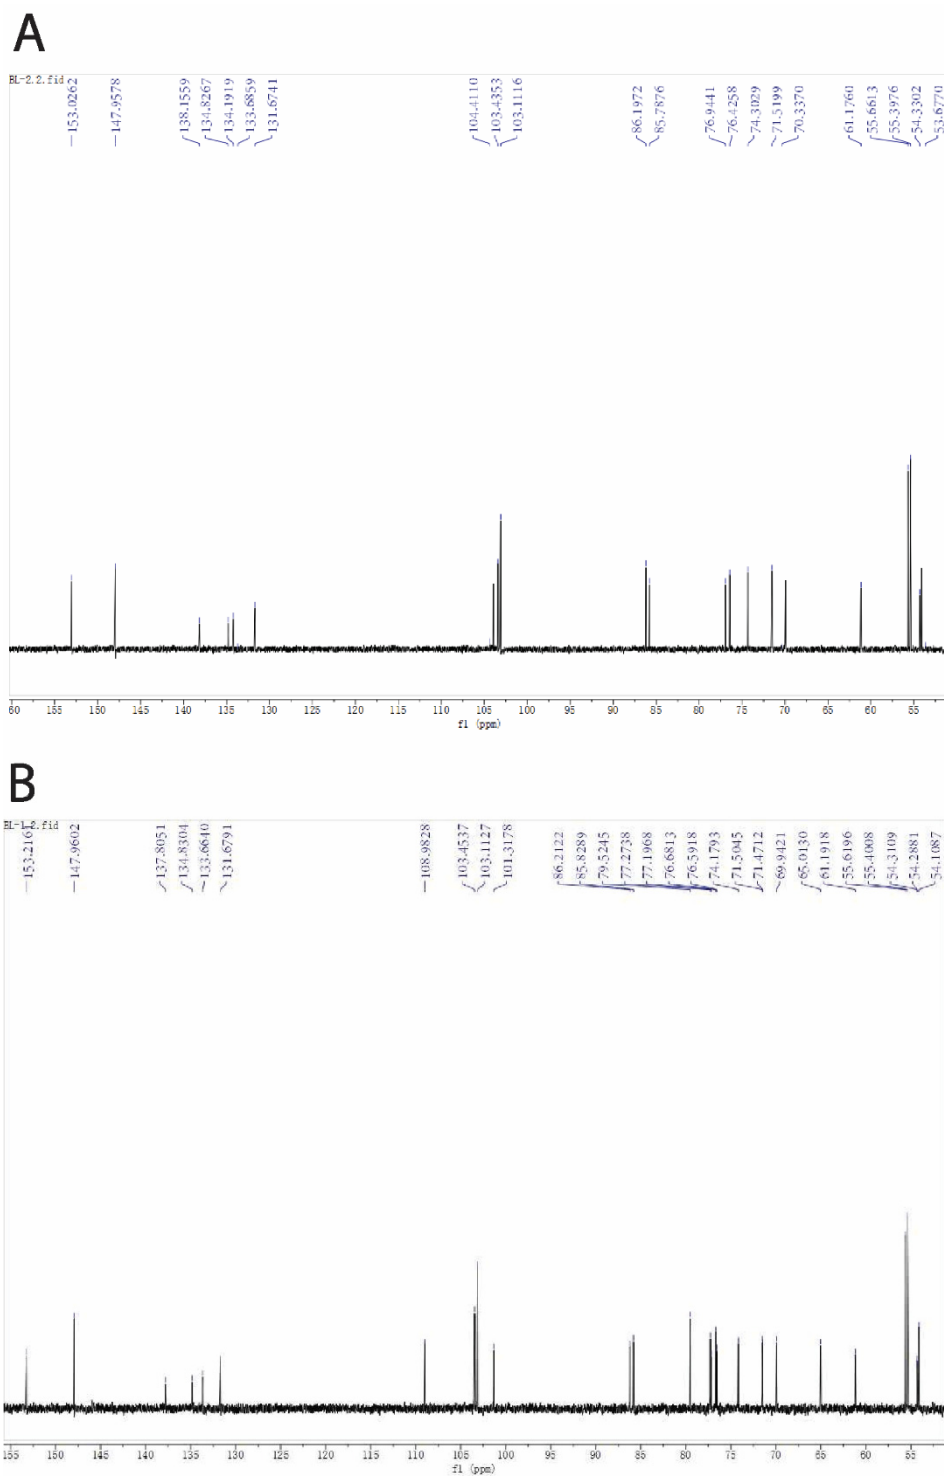

**Figure S3.**  $^{13}\text{C}$ -NMR spectrum of SAG (A) and SBG (B).  $^{13}\text{C}$ -NMR spectroscopy of the two compounds was detected with the Bruker NMR spectrometer Avance III 400 according to the manufacturer's manual.

**A**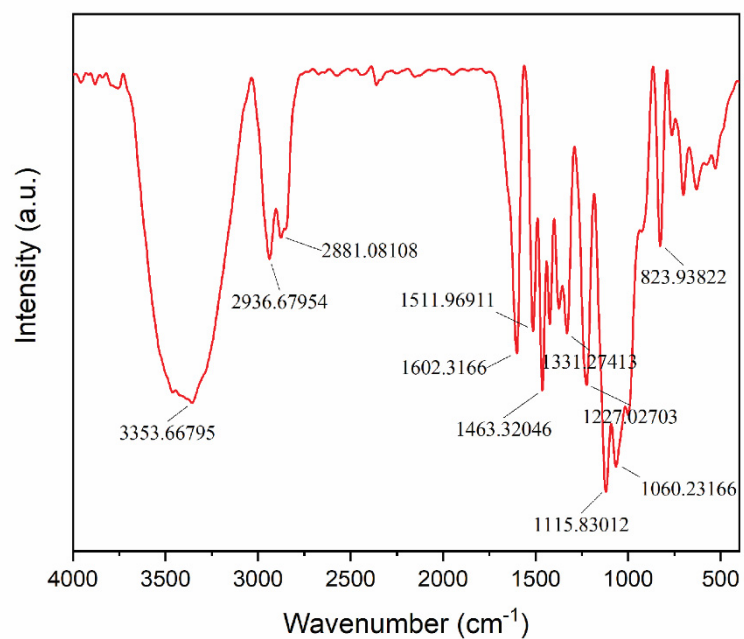**B**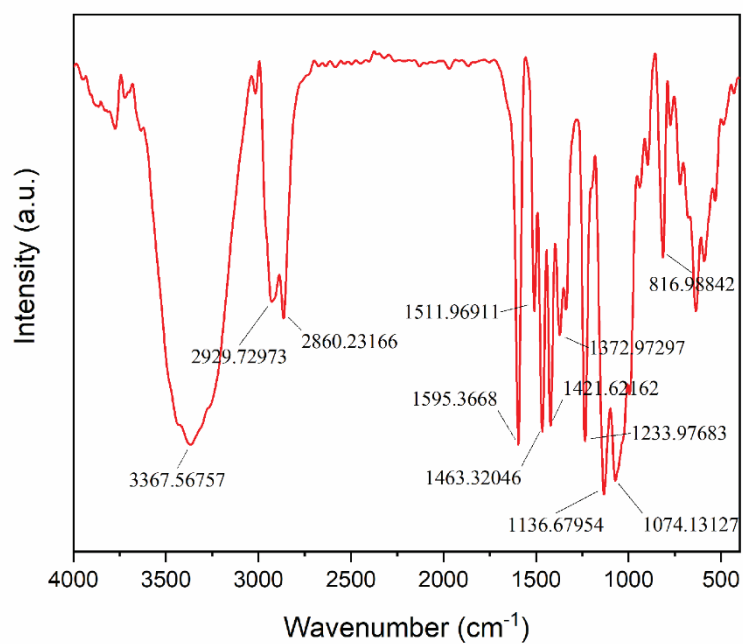

**Figure S4. IR spectrum of SAG (A) and SBG (B).** IR spectroscopy of the two compounds was measured with the IR spectrometer BRUKER TENSOR II under the resolution of  $4\text{ cm}^{-1}$ . The sample or background scan time was set at 16 scans, respectively, and the concave rubber band was used as a baseline correction method.

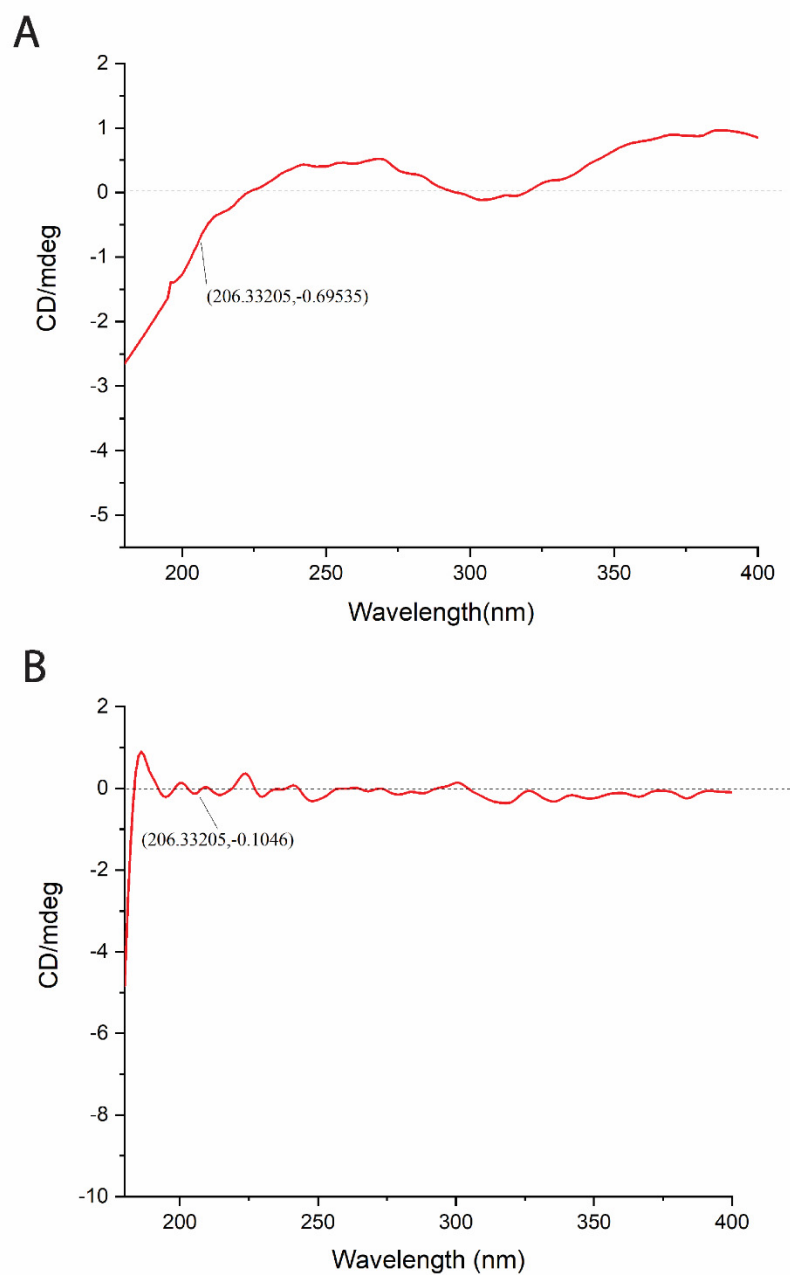

**Figure S5. CD spectrum of SAG (A) and SBG (B).** CD spectroscopy of the two compounds was measured with the CD spectrometer Chirascan under the conditions: detector type, PMT; time per point, 0.5 s; pathlength, 10 mm; wavelength, 180 – 400 nm; step size, 1 nm; Bandwidth, 1 nm.
